# Supplementary material for: Aberrant Auditory and Visual Memory Development of Children with Upper Limb Motor Disorders
Source: MDPI journal article supplement (doi:10.3390/brainsci11121650), 2021-12-15
Supplement: s1 [file s1]

Supplementary materials.

|              | AVERAGE AGE                  |        |               |        |
|--------------|------------------------------|--------|---------------|--------|
| AGE          | Children with motor disorder |        | Control group |        |
| 3 - 15 y.o.  | 8,3                          |        | 9,6           |        |
|              | MALE                         | FEMALE | MALE          | FEMALE |
| 3 - 15 y.o.  | 8,2                          | 8,4    | 9,2           | 10,1   |
|              | Children with motor disorder |        | Control group |        |
| 3 - 6 y.o.   | 4,7                          |        | 5,2           |        |
| 7 - 10 y.o.  | 8,8                          |        | 8,5           |        |
| 11 - 15 y.o. | 13,0                         |        | 12,5          |        |

Supplementary Table S1. Average values by age of children with motor disorders and the control group.

| Group          | Age period      | Children with motor disorder | Control group |
|----------------|-----------------|------------------------------|---------------|
| <b>Group A</b> | 3–6 years old   | 22 children                  | 6 children    |
| <b>Group B</b> | 7–10 years old  | 24 children                  | 13 children   |
| <b>Group C</b> | 11–15 years old | 11 children                  | 13 children   |

Supplementary Table S2. Visual representation of the division into groups by age of children with motor disorders and the control group.

|                 | Patients  |      |            |      |             |      | Controls  |      |            |      |             |      |
|-----------------|-----------|------|------------|------|-------------|------|-----------|------|------------|------|-------------|------|
|                 | 3-7 years |      | 8-10 years |      | 11-15 years |      | 3-7 years |      | 8-10 years |      | 11-15 years |      |
|                 | Mean      | SD   | Mean       | SD   | Mean        | SD   | Mean      | SD   | Mean       | SD   | Mean        | SD   |
| Attention Span  | 2.27      | 0.91 | 3.32       | 1.30 | 4.00        | 1.34 | 2.25      | 1.09 | 4.20       | 0.75 | 4.43        | 1.05 |
| Auditory Memory | 3.55      | 1.16 | 4.74       | 1.45 | 6.00        | 1.55 | 4.75      | 1.09 | 6.20       | 0.75 | 6.29        | 0.88 |
| Visual Memory   | 4.14      | 1.42 | 5.00       | 1.38 | 6.80        | 1.89 | 5.75      | 1.98 | 7.00       | 0.63 | 7.29        | 1.03 |
| Intelligence    | 2.32      | 0.87 | 2.68       | 0.92 | 2.80        | 1.08 | 2.50      | 0.87 | 2.20       | 0.40 | 2.43        | 1.40 |
| Storytelling    | 2.36      | 1.15 | 3.47       | 1.09 | 3.10        | 1.04 | 3.12      | 0.60 | 3.00       | 0.63 | 3.57        | 0.49 |
| Thinking        | 4.77      | 1.65 | 5.32       | 1.08 | 5.70        | 1.19 | 6.50      | 0.71 | 7.00       | 0.00 | 6.29        | 1.16 |
| ACS             | -0.57     | 0.49 | 0.05       | 0.48 | 0.43        | 0.49 | 0.04      | 0.28 | 0.52       | 0.20 | 0.63        | 0.21 |

Supplementary Table S3. Means and standard deviation (SD) of scores for both groups of children in all age ranges

|                 | Age       |             |            |         | Group     |             |            |         | Sex       |      |            |      |
|-----------------|-----------|-------------|------------|---------|-----------|-------------|------------|---------|-----------|------|------------|------|
|                 | F (1, 64) | p           | $\eta_p^2$ | q       | F (1, 64) | p           | $\eta_p^2$ | q       | F (1, 64) | p    | $\eta_p^2$ | q    |
| Attention Span  | 38.80     | < 0.001 *** | 0.37       | < 0.001 | 2.89      | 0.09        | 0.04       | 0.13    | 1.15      | 0.29 | 0.02       | 0.50 |
| Auditory Memory | 37.92     | < 0.001 *** | 0.36       | < 0.001 | 12.74     | < 0.001 *** | 0.16       | < 0.01  | 0.46      | 0.50 | 0.01       | 0.58 |
| Visual Memory   | 23.57     | < 0.001 *** | 0.26       | < 0.001 | 16.19     | < 0.001 *** | 0.19       | < 0.001 | 2.11      | 0.15 | 0.03       | 1.00 |
| Intelligence    | 0.81      | 0.37        | 0.01       | 0.37    | 0.33      | 0.57        | 0.00       | 0.57    | 1.80      | 0.18 | 0.03       | 0.43 |
| Storytelling    | 8.97      | < 0.01 **   | 0.12       | < 0.01  | 1.45      | 0.23        | 0.02       | 0.27    | 1.94      | 0.17 | 0.03       | 0.59 |
| Thinking        | 5.24      | < 0.05 *    | 0.07       | < 0.05  | 17.28     | < 0.001 *** | 0.21       | < 0.001 | 0.71      | 0.40 | 0.01       | 0.56 |
| ACS             | 58.43     | < 0.001 *** | 0.47       | < 0.001 | 20.84     | < 0.001 *** | 0.24       | < 0.001 | 0.03      | 0.87 | 0.00       | 0.87 |

Supplementary Table S4. Statistical results for cognitive performance (ANCOVA) as a function of factors Group (df = 1; either patient or control), Sex (df = 1; either male or female) and Age (continuous).
